# Supplementary material for: MOF-Derived CeO2 Nanorod as a Separator Coating Enabling Enhanced Performance for Lithium–Sulfur Batteries
Source: MDPI journal article supplement (doi:10.3390/molecules29081852), 2024-04-18
Supplement: s1 [file s1]

## Supporting information

# MOF-Derived CeO<sub>2</sub> Nanorod as a Separator Coating Enabling Enhanced Performance for Lithium–Sulfur Batteries

Hao Xiao <sup>1,2,3,4,5</sup>, Jian Qin <sup>1,2,3,4,5</sup>, Haodong Wang <sup>2,3,4,5</sup>, Xiaoxu Lai <sup>2,3,4,5</sup>, Pei Shi <sup>2,3,4,5</sup>, Chi Chen <sup>2,3,4,5,\*</sup> and Dan Sun <sup>2,3,4,5,\*</sup>

<sup>1</sup> College of Chemistry, Fuzhou University, Fuzhou 350116, China;  
xmxiaohao@fjirsm.ac.cn (H.X.);  
xmjinjian@fjirsm.ac.cn (J.Q.)

<sup>2</sup> CAS Key Laboratory of Design and Assembly of Functional Nanostructures, and Fujian Provincial Key Laboratory of Nanomaterials, Fujian Institute of Research on the Structure of Matter, Chinese Academy of Sciences, Fuzhou 350002, China; whd19855695910@163.com (H.W.); xmlaixiaoxu@fjirsm.ac.cn (X.L.); 348936@whut.edu.cn (P.S.)

<sup>3</sup> Xiamen Institute of Rare Earth Materials, Haixi Institutes, Chinese Academy of Sciences, Xiamen 361021, China

<sup>4</sup> Xiamen Key Laboratory of Rare Earth Photoelectric Functional Materials, Xiamen 361021, China

<sup>5</sup> Fujian College, University of Chinese Academy Sciences, Fuzhou 350002, China

\* Correspondence: xmchenchi@fjirsm.ac.cn (C.C.); xmsundan@fjirsm.ac.cn (D.S.)

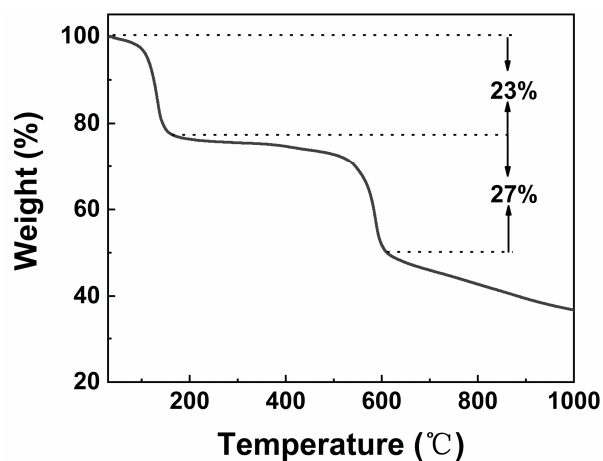

Figure S1. Thermogravimetric analysis curve of Ce-MOF to determine the calcination temperature for the synthesis of CeO<sub>2</sub>.

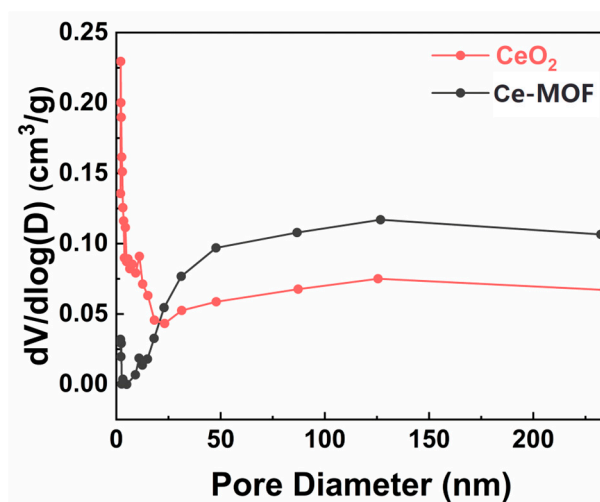

Figure S2. Pore size distributions of Ce-MOF and CeO<sub>2</sub>, respectively.

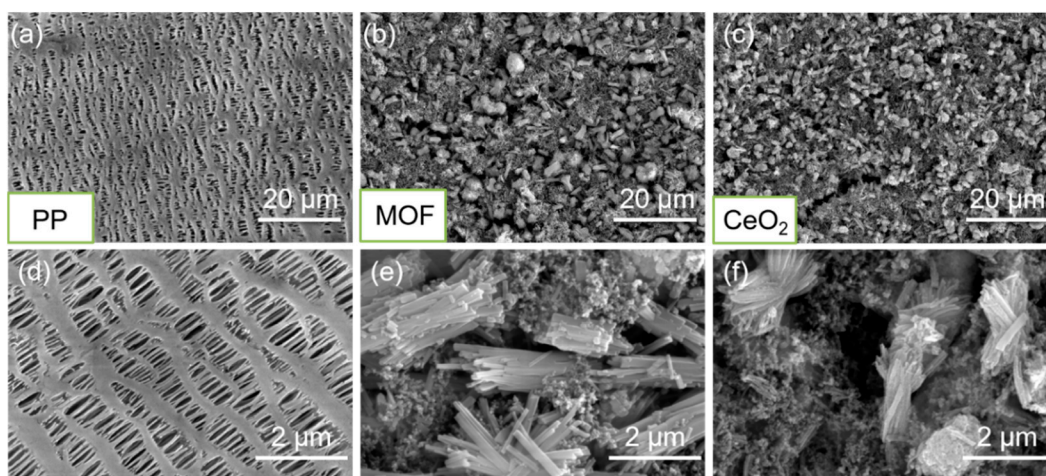

Figure S3. SEM images of (a, d) pristine polypropylene (PP) separator, (b, e) Ce-MOF modified separator and (c, f) CeO<sub>2</sub> modified separator.

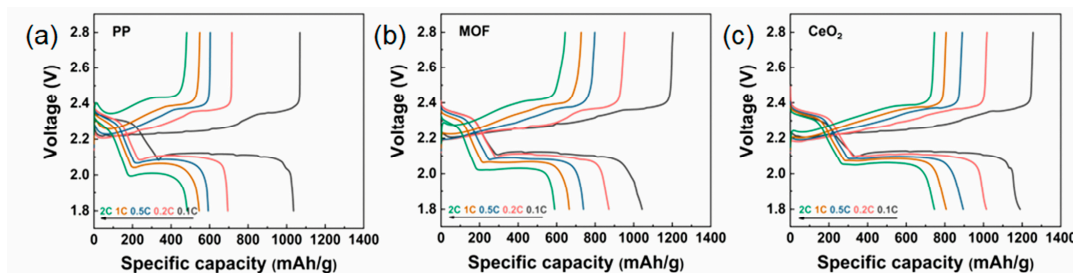

Figure S4. Charge-discharge profiles of Li-S batteries with (a) PP separator, (b) Ce-MOF, and (c) CeO<sub>2</sub> modified separators at different current densities of 0.1, 0.2, 0.5, 1, 2 C.

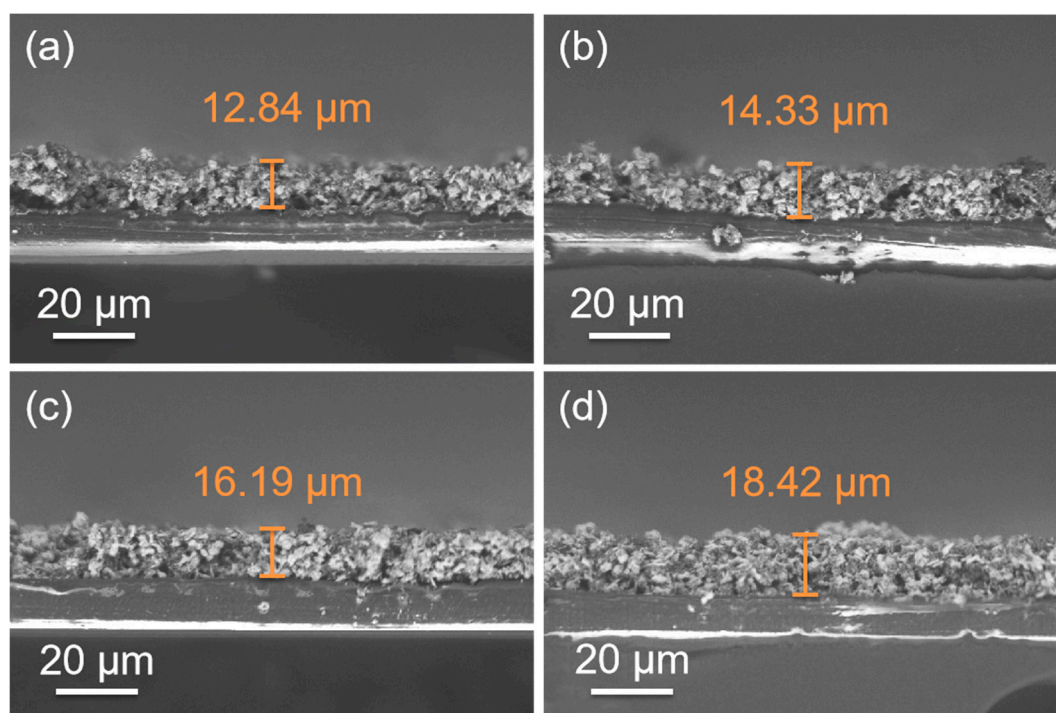

Figure S5. Cross-sectional SEM images of (a) CeO<sub>2</sub>-25, (b) CeO<sub>2</sub>-50, (c) CeO<sub>2</sub>-75 and (d) CeO<sub>2</sub>-100 modified separators.

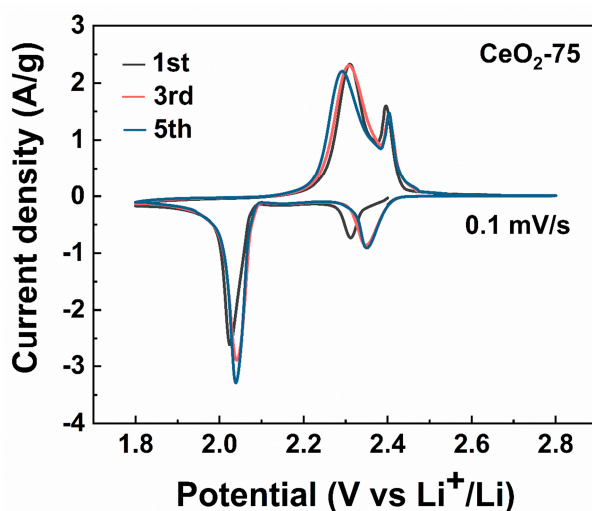

Figure S6. The first, third and fifth cycled CV curves of Li-S batteries with CeO<sub>2</sub>-75 modified separators at a scan rate of 0.1 mV/s.

Table S1. The ratio between the second plateau (II) and discharge capacity of the cells with various separators.

| II (%)           | Current density |         |         |         |         |
|------------------|-----------------|---------|---------|---------|---------|
|                  | 0.1 C           | 0.2 C   | 0.5 C   | 1 C     | 2 C     |
| PP               | 68.10 %         | 66.00 % | 59.20 % | 62.50 % | 60.50 % |
| MOF              | 72.20 %         | 67.00 % | 66.00 % | 67.80 % | 67.60 % |
| CeO <sub>2</sub> | 71.20 %         | 67.00 % | 67.00 % | 65.70 % | 64.40 % |

Table S2. Thicknesses of coating in CeO<sub>2</sub>-25, CeO<sub>2</sub>-50, CeO<sub>2</sub>-75 and CeO<sub>2</sub>-100 modified separators.

| Sample               | Thickness (μm) |
|----------------------|----------------|
| CeO <sub>2</sub> -25 | 12.84          |
| CeO <sub>2</sub> -50 | 14.33          |

|                      |       |
|----------------------|-------|
| CeO <sub>2</sub> -75 | 16.19 |
|----------------------|-------|

|                       |       |
|-----------------------|-------|
| CeO <sub>2</sub> -100 | 18.42 |
|-----------------------|-------|

---
